# Supplementary material for: Synthesis of hyaluronic acid core–shell nanoparticles via simple microfluidic-assisted nanoprecipitation method for active tumor targeting
Source: Royal Society of Chemistry journal article supplement (doi:10.1039/d2nj03279a), 2022-01-01
Supplement: d2nj03279a1.pdf [file d2nj03279a1.pdf]

## Supplementary Information

### Synthesis of hyaluronic acid core-shell nanoparticles *via* simple microfluidic-assisted nanoprecipitation method for active tumor targeting

Antonio Fabozzi<sup>2</sup>, Francesca Della Sala<sup>1</sup>, Mario di Gennaro<sup>1,3</sup>, Assunta Borzacchiello<sup>1\*</sup>.

<sup>1</sup>Institute for Polymers, Composites and Biomaterials, National Research Council, IPCB-CNR, Naples, Italy.

<sup>2</sup>ALTERGON ITALIA S.r.l., Zona Industriale ASI - 83040 Morra De Sanctis (AV)

<sup>3</sup>Department of Environmental, Biological and Pharmaceutical Sciences and Technologies (DiSTABiF), University of Campania "L. Vanvitelli", 81100 Caserta, Italy.

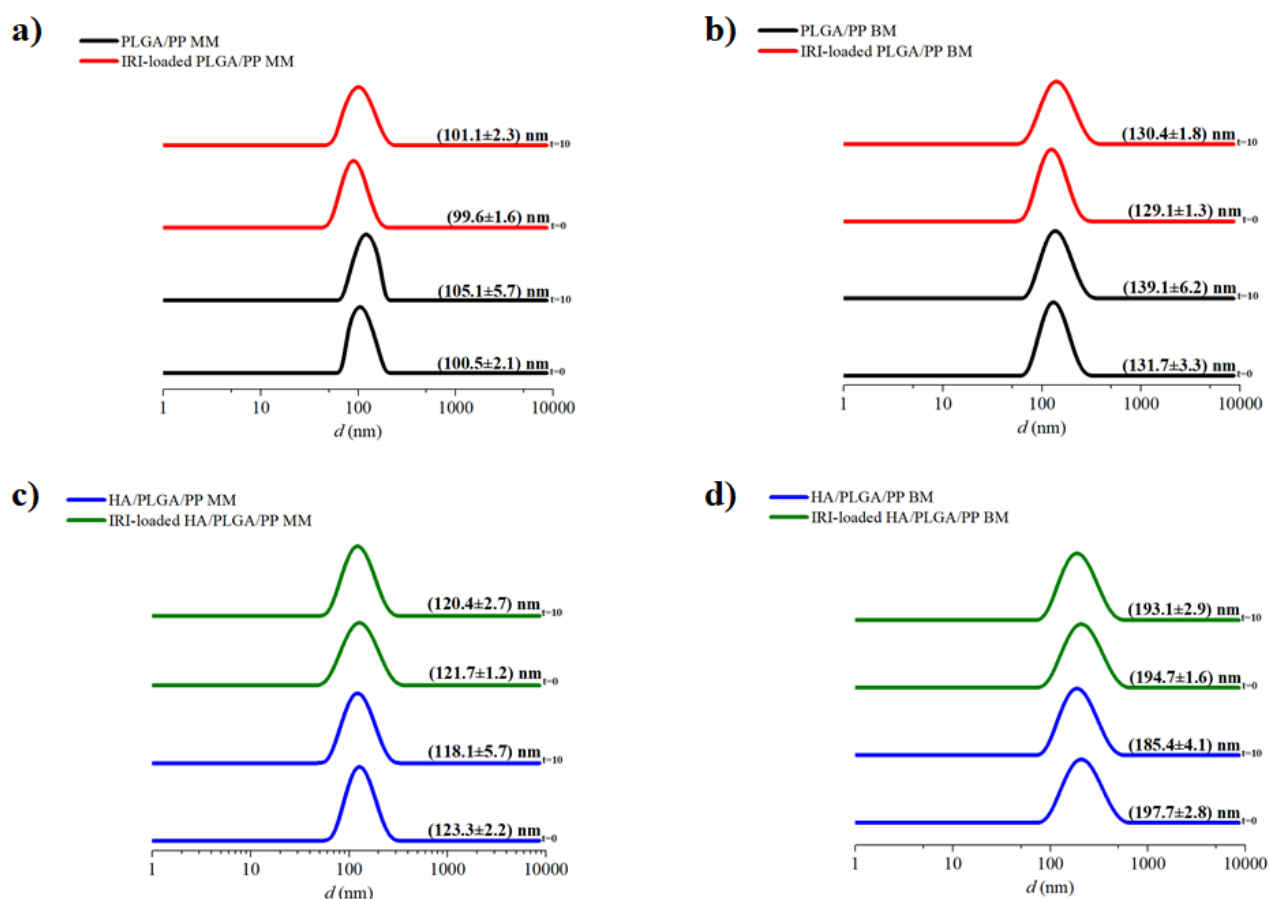

Figure S1. Intensity–average diameters over time of NPs: a) PLGA/PP MM (black) and IRI-loaded PLGA/PP (red) MM, b) PLGA/PP BM (black) and IRI-loaded PLGA/PP (red) BM, c) HA/PLGA/PP MM (blue) and IRI-loaded HA/PLGA/PP (green) MM, d) HA/PLGA/PP BM (blue) and IRI-loaded HA/PLGA/PP (green) BM

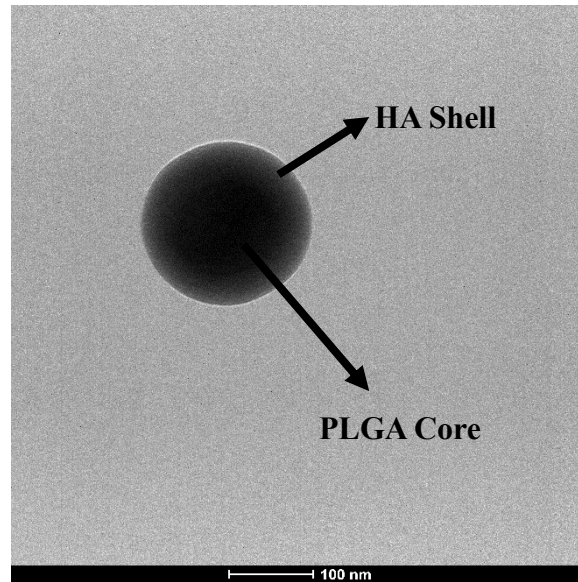

Figure S2. TEM micrograph of core-shell HA/PLGA/PP fabricated by MM.

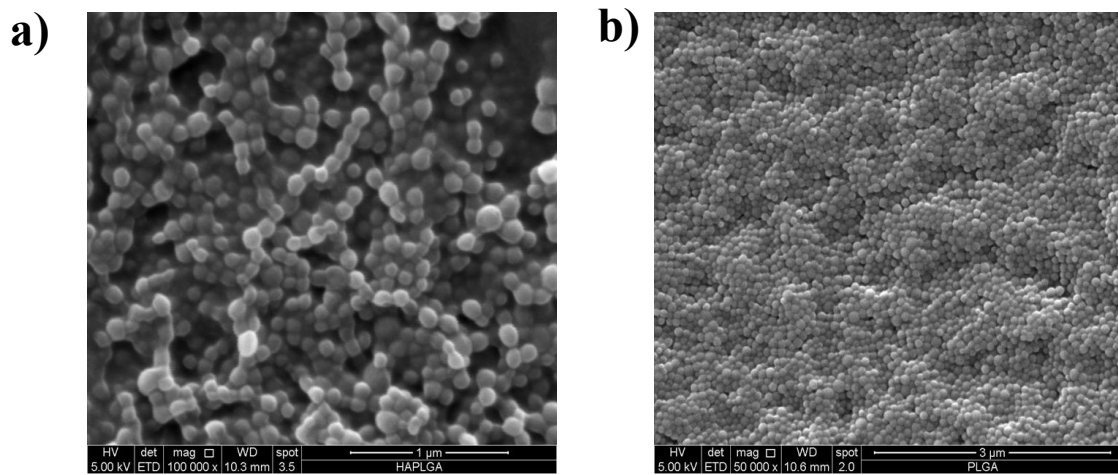

Figure S3. SEM micrographs of NPs fabricated by MM: a) HA/PLGA/PP, b) PLGA/PP.
